# Supplementary material for: An energy-dense and thermal-stable bis-azobenzene/hybrid templated assembly for solar thermal fuel
Source: Royal Society of Chemistry journal article supplement (doi:10.1039/c6ta00221h), 2016-01-01
Supplement: c6ta00221h1.pdf [file c6ta00221h1.pdf]

# Supporting Information

**An Energy-Dense and Thermal-Stable *bis*-Azobenzene/Hybrid**

**Templated Assembly for Solar Thermal Fuel**

Wei Feng\*, Shipei Li, Man Li, Chengqun Qin and Yiyu Feng\*

School of Materials Science and Engineering, Tianjin University and Tianjin Key Laboratory of Composite and Functional Materials, Tianjin 300072, P. R. China

Corresponding Author

\*E-mail: weifeng@tju.edu.cn, fengyiyu@tju.edu.cn Tel:+86-22-87402059. Fax: +86-22-27404724.

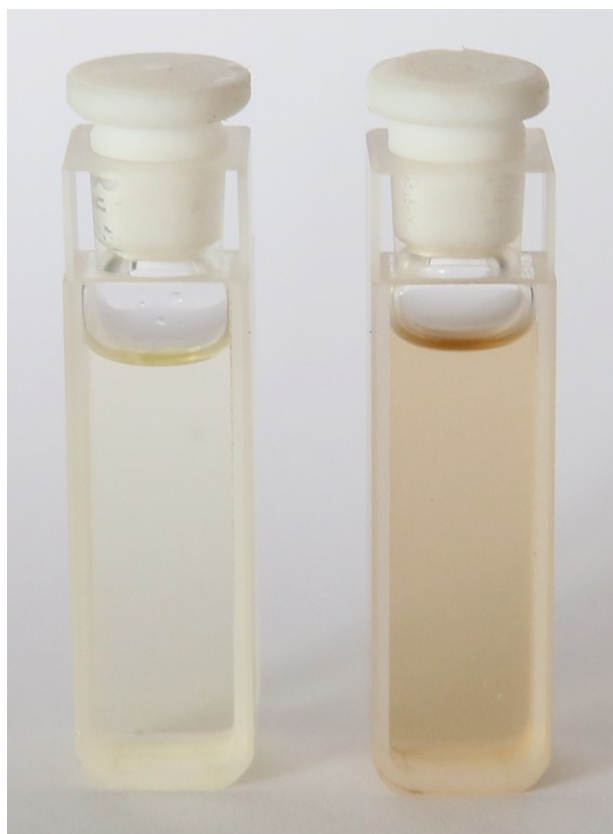

**Fig. S1** Dispersion of *bis-Azo* ( $10.3 \text{ mg L}^{-1}$ ) and *RGO-bis-Azo* ( $35.2 \text{ mg L}^{-1}$ ) in DMF. Dilute dispersions of *bis-Azo* (left) and *RGO-bis-Azo* (right) are used for photoisomerization measurements.

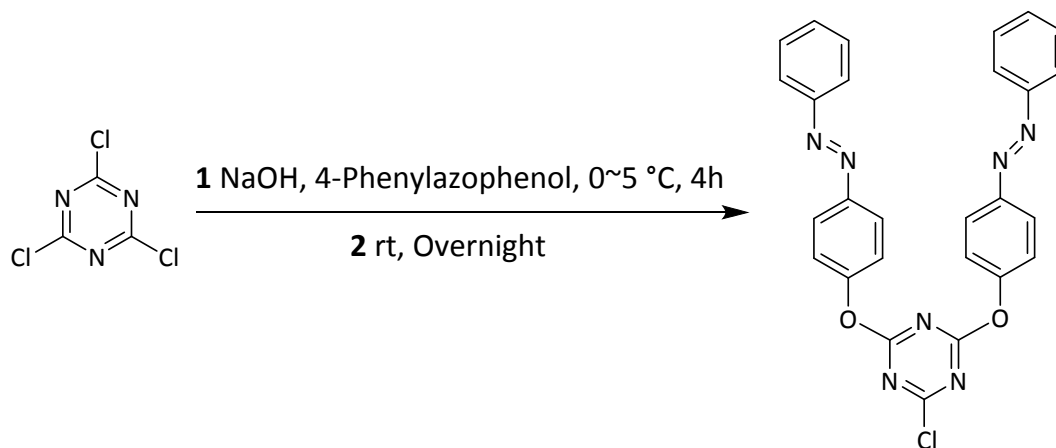

**Fig. S2** Synthetic route of *bis-Azo*.

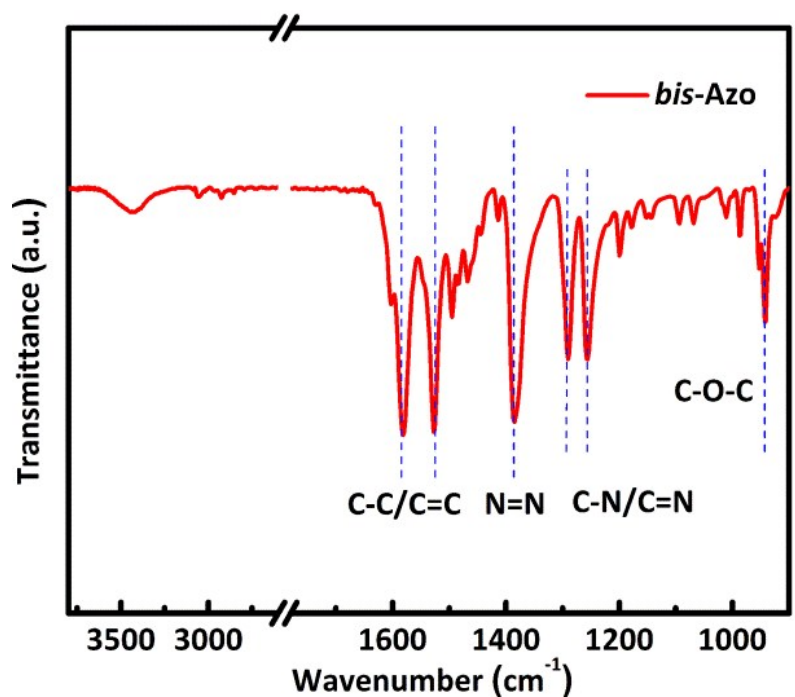

Fig. S3 FT-IR spectra of *bis-Azo*.

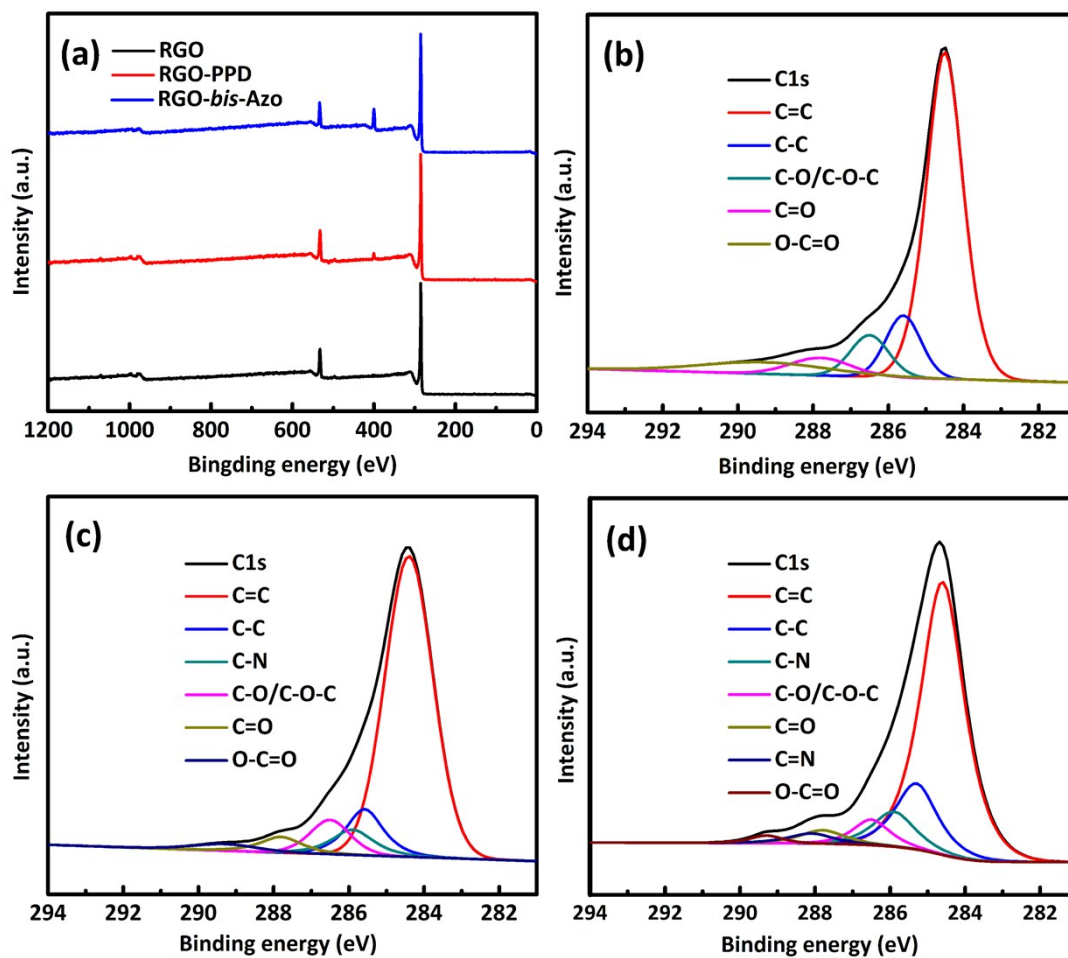

**Fig. S4** (a) XPS wide scan survey spectra of RGO, RGO-PPD and RGO-*bis*-Azo. C1 region in XPS spectra of (b) RGO, (c) RGO-PPD and (d) RGO-*bis*-Azo.

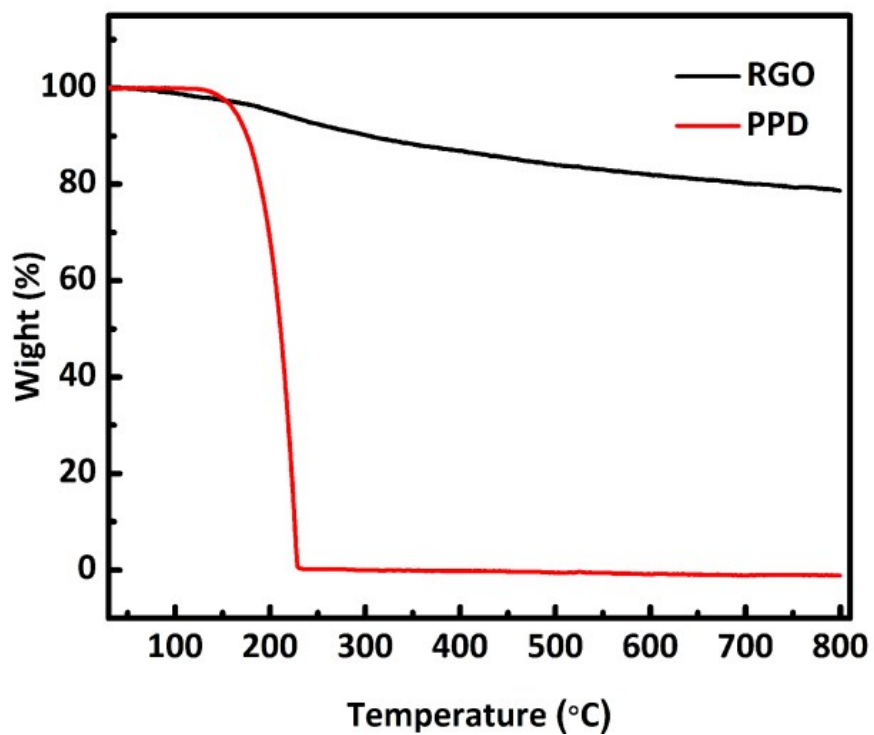

Fig. S5 TG curves of RGO and PPD.

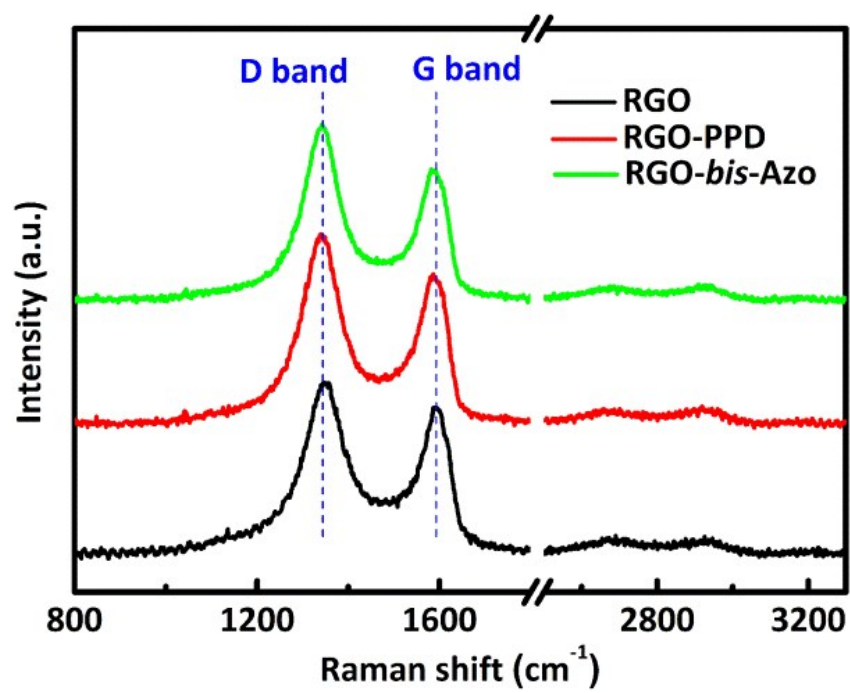

Fig. S6 Raman spectra of RGO, RGO-PPD and RGO-*bis*-Azo.

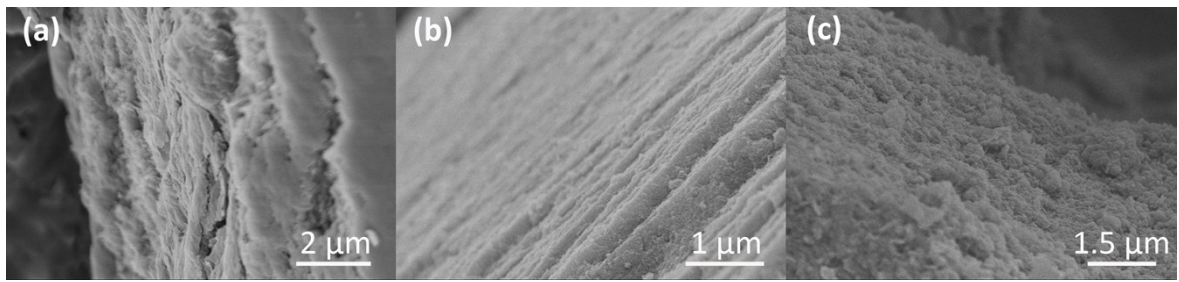

**Fig. S7** SEM images of (a) RGO, (b) RGO-PPD and (c) RGO-*bis*-Azo.



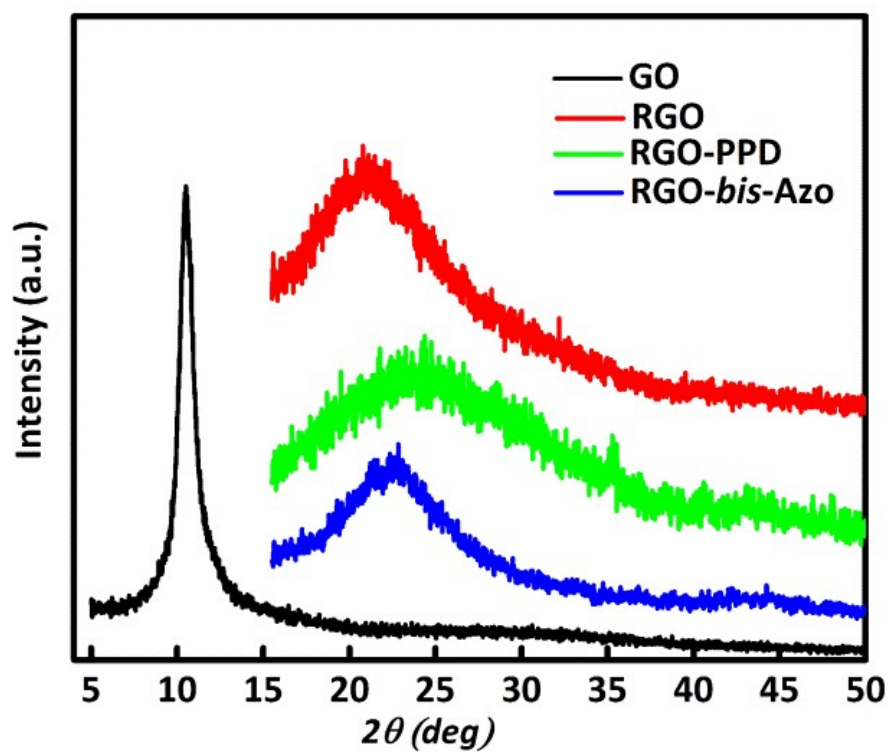

Fig. S8 XRD patterns of GO, RGO, RGO-PPD and RGO-*bis*-Azo.

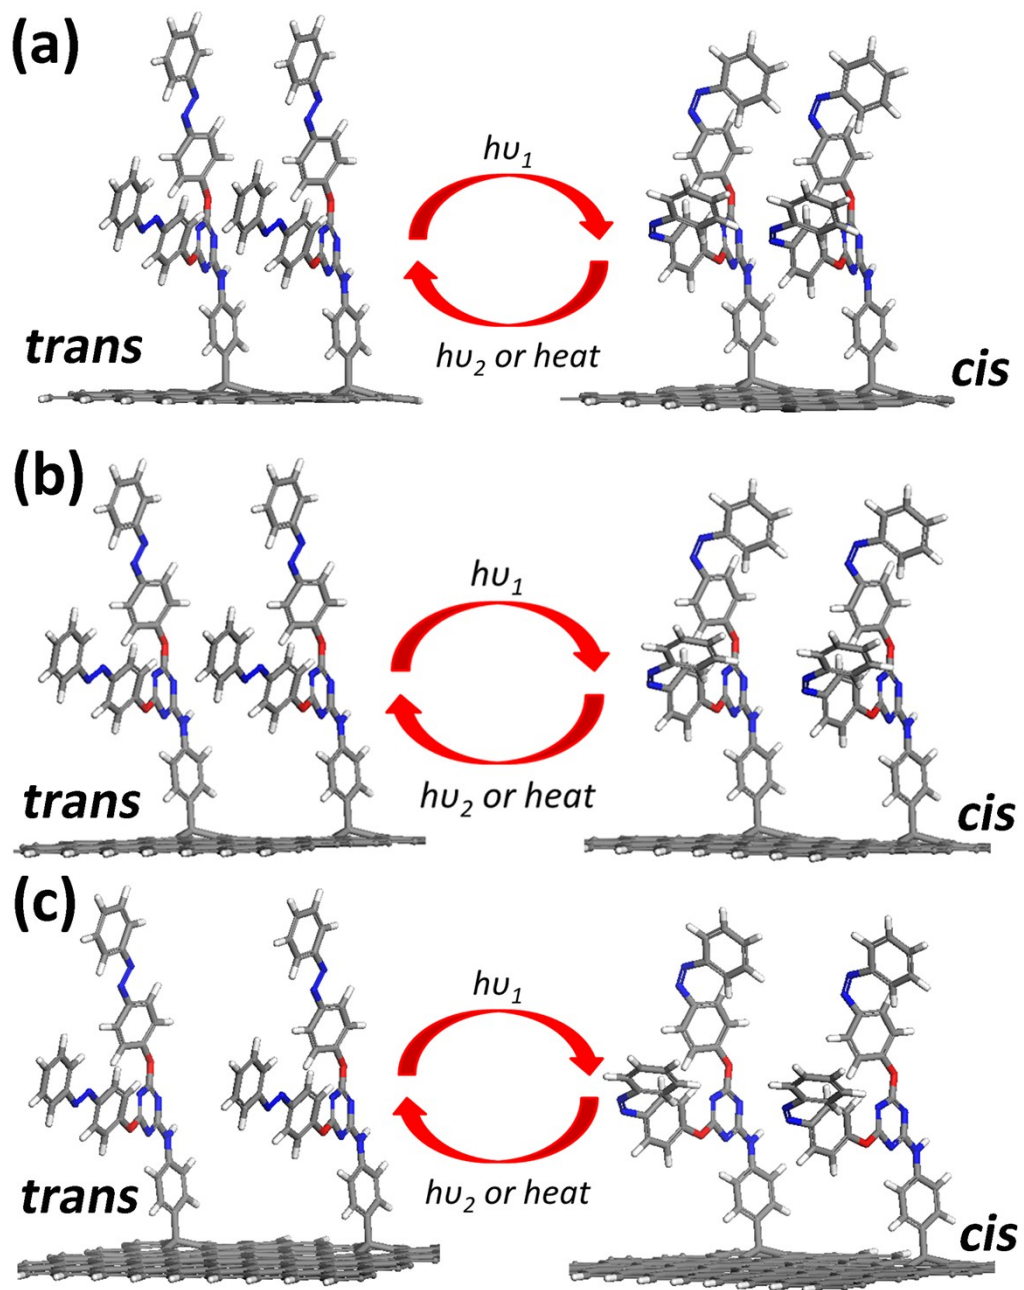

**Fig. S9** Stable models of *trans*-isomer and *cis*-isomer by DFT calculation: (a) RGO-*bis*-Azo (1:54); (b) RGO-*bis*-Azo\*\* (1:72); (c) RGO-*bis*-Azo\* (1:90).

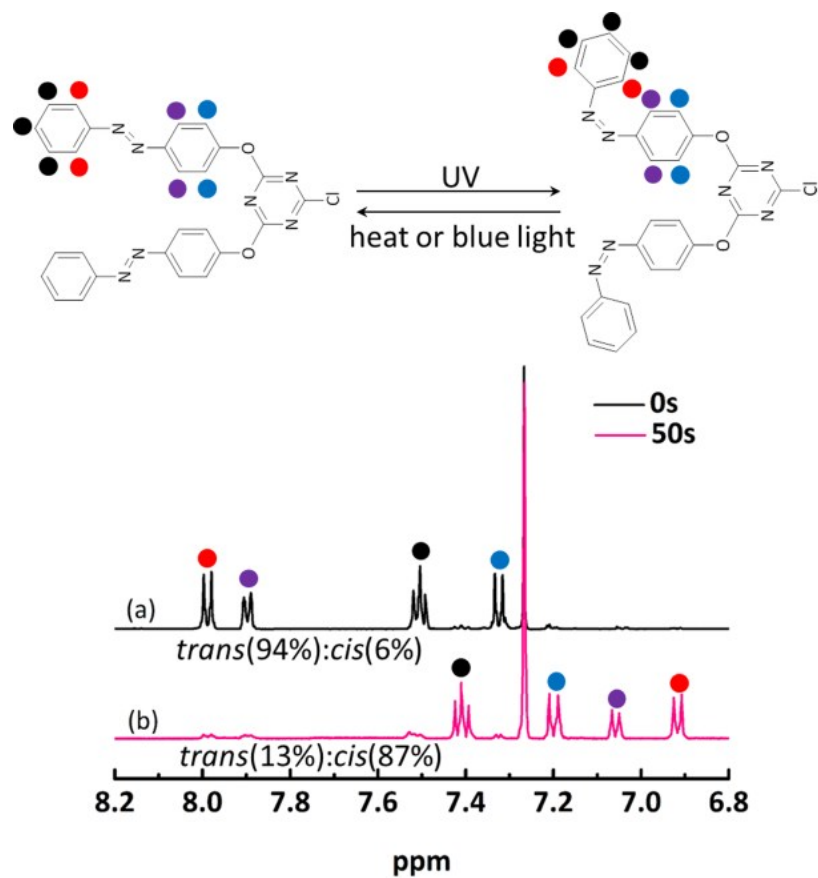

**Fig. S10**  $^1\text{H NMR}$  spectra of *bis*-Azo in  $\text{CDCl}_3$ : (a) before the irradiation and (b) after UV irradiation for 50 s.

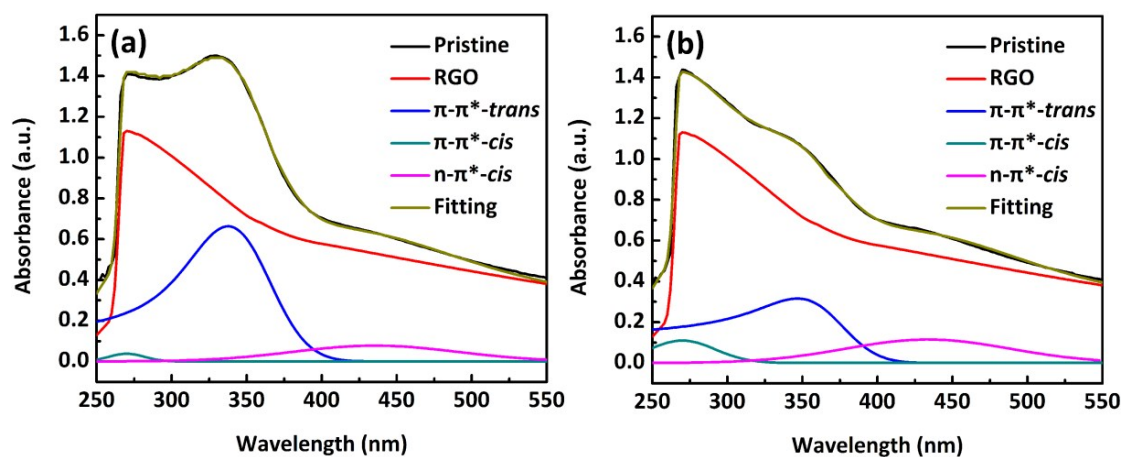

**Fig. S11** The fitted absorption spectra of RGO-*bis*-Azo: (a) before the irradiation and (b) after UV irradiation for 130 min (at the photostationary state).

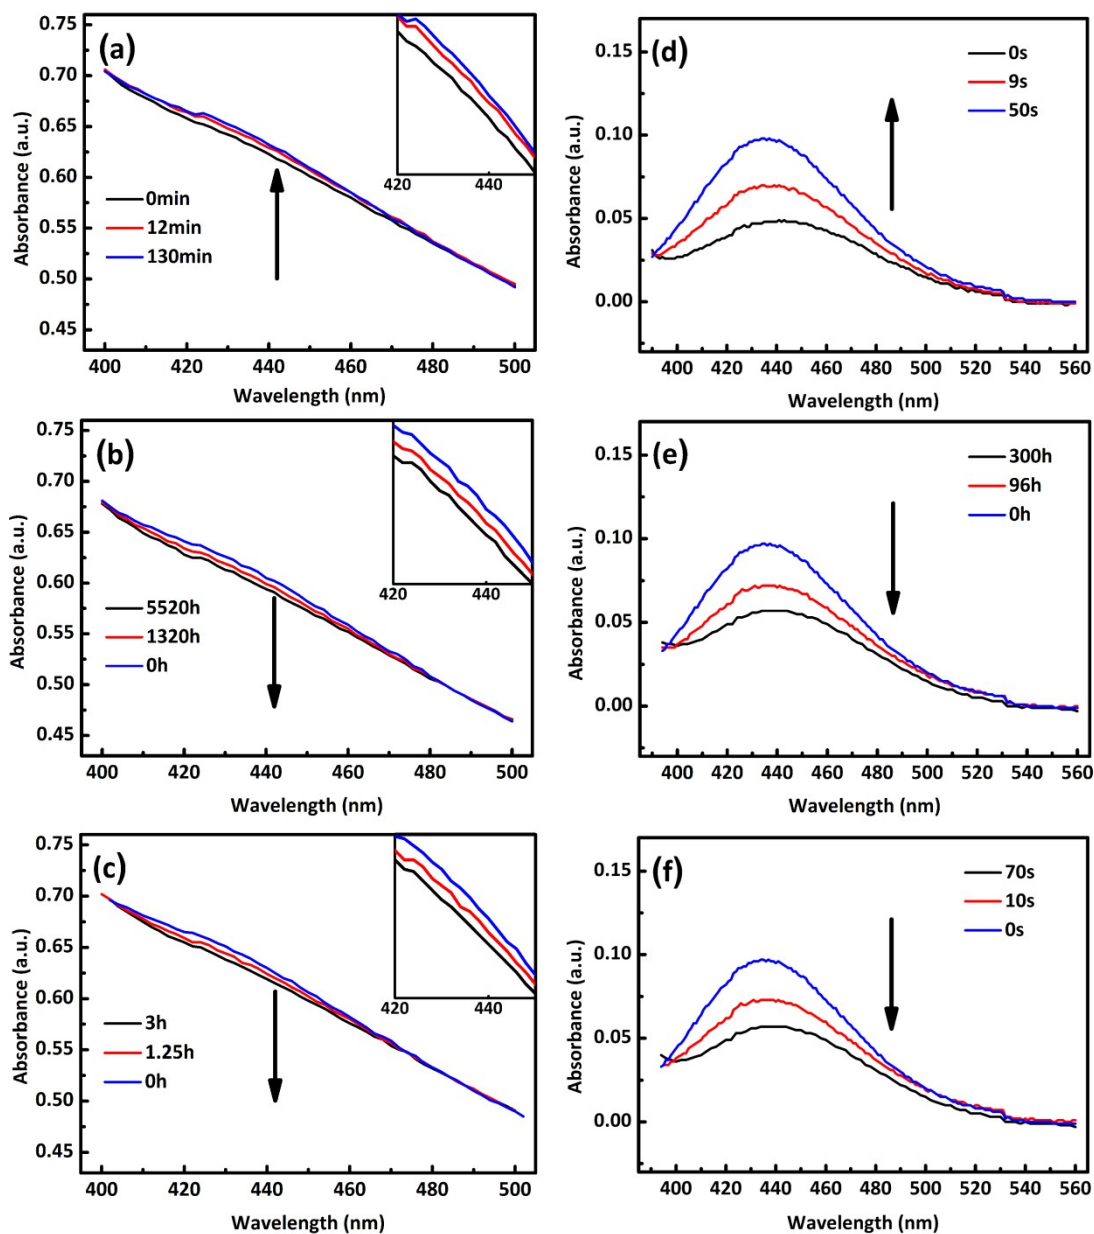

**Fig. S12** Time-evolved absorption spectra for  $n\text{-}\pi^*$  of RGO-*bis*-Azo (35.2 mg L<sup>-1</sup>) and *bis*-Azo (10.3 mg L<sup>-1</sup>) irradiated by (a, d) UV light at 365 nm, (b, e) after UV irradiation in darkness and (c, f) blue light at 450 nm.

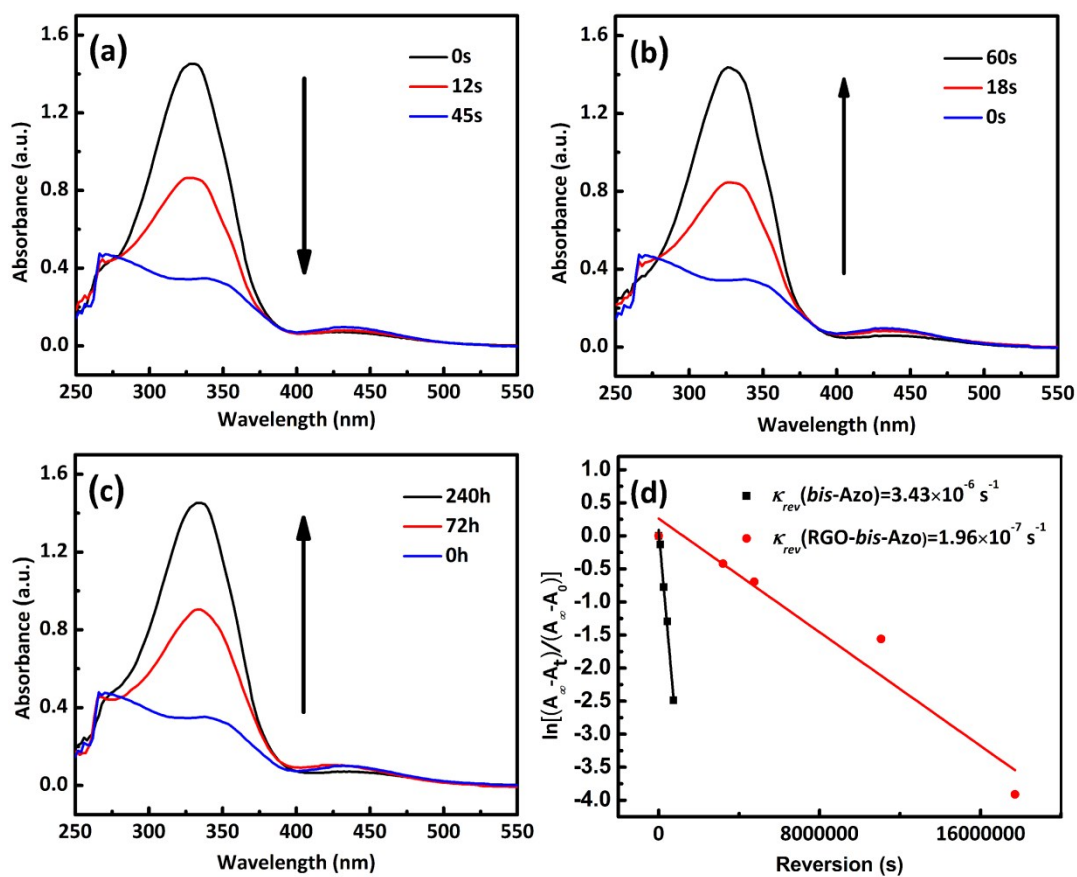

**Fig. S13** Time-evolved absorption spectra of Azo ( $14.3 \text{ mg L}^{-1}$ ) changed at room temperature. (a) Azo irradiated by UV light at 365 nm, (b) Azo irradiated by blue light at 450 nm, (c) Azo reversed in darkness. (d) First plots of  $cis \leftrightarrow trans$  reversion of RGO-*bis*-Azo and *bis*-Azo in darkness.

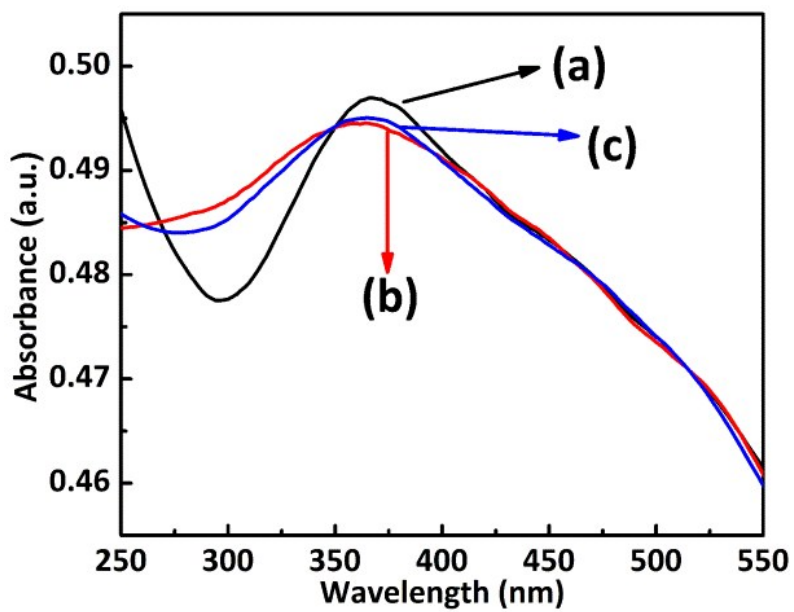

**Fig. S14** Time-evolved absorption spectra of RGO-*bis*-Azo film (a) before the irradiation, (b) after UV irradiation for 2.5 h and (c) in dark for 840 h.

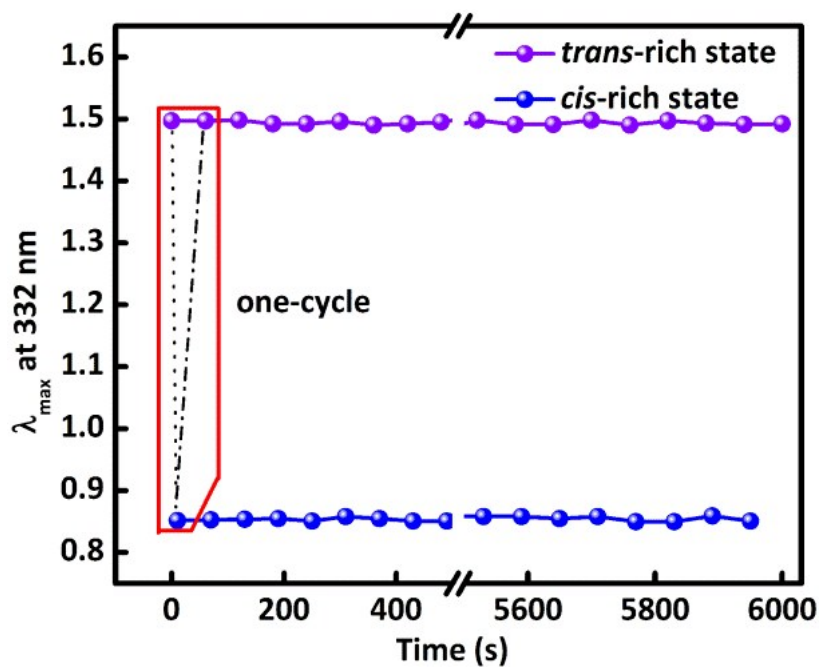

**Fig. S15** Cycling stability of *trans* $\leftrightarrow$ *cis* isomerization of *bis*-Azo in DMF induced by alternately irradiating UV light and blue light (450 nm) for 10 s and 50 s (at the photo-stationary balance). *bis*-Azo hybrid shows excellent cycling stability of *trans* $\leftrightarrow$ *cis* isomerization for 100 cycles without degradation.



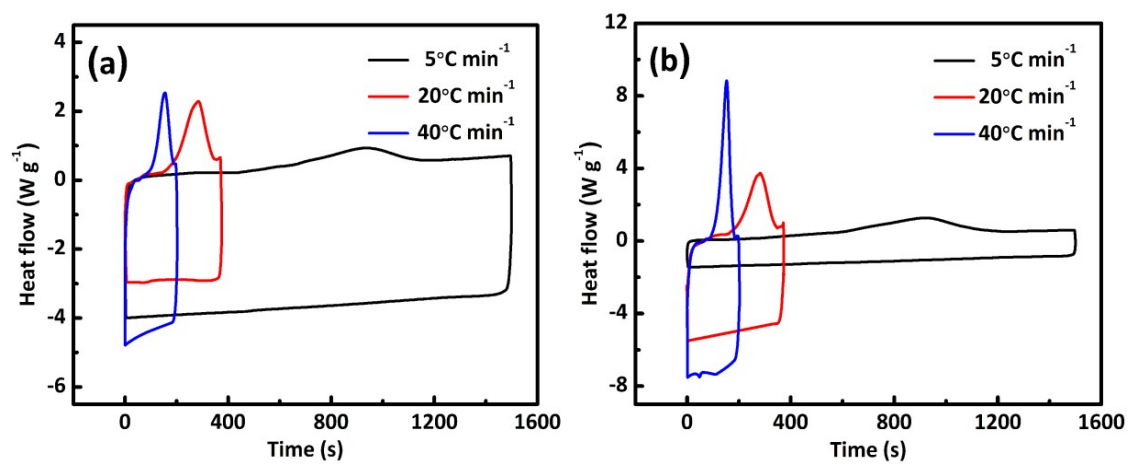

**Fig. S16** DSC traces of (a) *bis*-Azo and (b) RGO-*bis*-Azo with different heating rates.

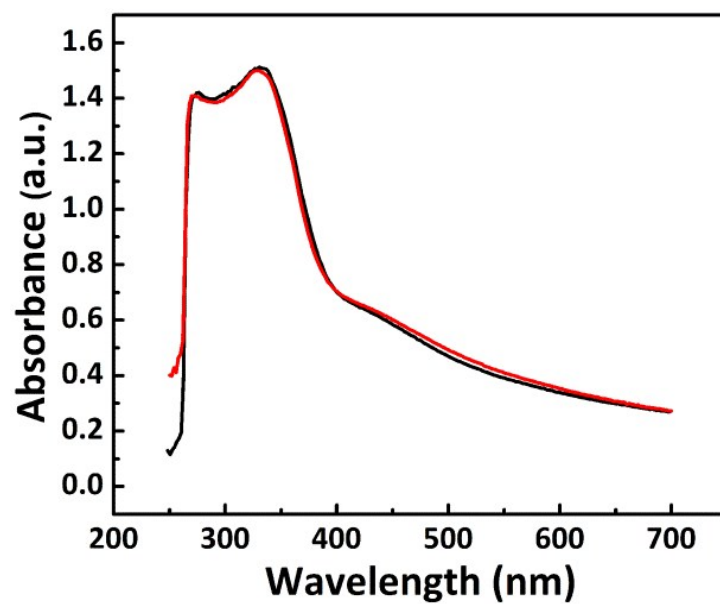

**Fig. S17** Absorption spectra of RGO-*bis*-Azo in DMF before the irradiation (red) and after the first time heating (black) in DSC measurement.

**Table S1.** TGA and XPS data of RGO-*bis*-Azo.

|                        | TGA   |           |       | $D_f$  | XPS                 |      | $D_f$ |
|------------------------|-------|-----------|-------|--------|---------------------|------|-------|
|                        | 700   | $D_t$ (%) |       |        | Element Content (%) |      |       |
|                        |       | 750       | 800   |        | C                   | N    |       |
| RGO                    | 81.92 | 81.14     | 79.55 | /      | 85.1                | /    |       |
| <i>bis</i> -Azo        | 29.39 | 25.65     | 21.87 | /      | /                   | /    |       |
| RGO-PPD                | 68.58 | 65.13     | 62.32 | 1:22.3 | 83.6                | 3.2  | 1:21  |
| RGO- <i>bis</i> -Azo   | 57.06 | 52.20     | 49.18 | 1:51.1 | 79.2                | 10.1 | 1:50  |
| RGO- <i>bis</i> -Azo*  | 67.95 | 64.70     | 61.87 | 1:91.2 | 81.3                | 7.6  | 1:91  |
| RGO- <i>bis</i> -Azo** | 68.10 | 64.50     | 61.85 | 1:73.5 | 80.6                | 8.4  | 1:74  |

$D_f$  is grafting density; RGO-*bis*-Azo\* and RGO-*bis*-Azo\*\* are the hybrid with different grafting densities.

**Table S2.** Intensity ratio of D band to G band

|           | RGO  | RGO-PPD | RGO- <i>bis</i> -Azo |
|-----------|------|---------|----------------------|
| $I_D/I_G$ | 1.14 | 1.27    | 1.30                 |

### Equation S1

$$D_f(\%) = \frac{R_p - R}{R_p - R_a} \times 100\%$$

$R_a$  is the residual weight percentage of *bis*-Azo,  $R$  is the residual weight percentage of RGO-*bis*-Azo,  $R_p$  is the residual weight percentage of RGO-PPD.

### Equation S2

$$\ln\left(\frac{A_\infty - A_t}{A_\infty - A_0}\right) = -k_{rev}t$$

$A_0$  is the absorption intensity of *bis*-Azo and RGO-*bis*-Azo at metastable state (*cis*-rich) irradiated by UV light,  $A_t$  is the absorption intensity of *bis*-Azo and RGO-*bis*-Azo reversing for “ $t$ ” time and  $A_\infty$  is the absorption intensity of *bis*-Azo and RGO-*bis*-Azo after complete *cis*-trans reversion.

### Equation S3

$$E_a = -RT \ln \frac{h \ln 2}{\tau_{1/2} k_B T}$$

$T$  is the storage temperature and,  $\tau_{1/2}$  is the half life.  $k_B$ ,  $R$  and  $h$  are the Boltzman, gas and Plank constants, respectively.

**Data S1.** The coordinates of optimized Geometries for RGO-*bis*-AZO hybrids by DFT.

*cis*-RGO-*bis*-AZO (1:54)

|   |             |              |             |
|---|-------------|--------------|-------------|
| C | 0.665823837 | 10.476456136 | 1.700000000 |
| C | 0.665823837 | 13.317018214 | 1.700000000 |
| C | 0.665823837 | 14.737299253 | 1.700000000 |
| C | 0.665823837 | 17.577861331 | 1.700000000 |
| C | 0.665823837 | 18.998142369 | 1.700000000 |
| C | 0.665823837 | 21.838704447 | 1.700000000 |
| C | 0.665823837 | 23.258985486 | 1.700000000 |
| C | 0.665823837 | 26.099547564 | 1.700000000 |
| C | 0.665823837 | 27.519828603 | 1.700000000 |
| C | 6.835824377 | 11.186596656 | 1.700000000 |
| C | 5.605824917 | 10.476456136 | 1.700000000 |
| C | 4.375825457 | 11.186596656 | 1.700000000 |
| C | 6.835824377 | 12.606877694 | 1.700000000 |
| C | 5.605824917 | 13.317018214 | 1.700000000 |
| C | 6.835824377 | 15.447439772 | 1.700000000 |
| C | 3.145825997 | 10.476456136 | 1.700000000 |
| C | 1.915826536 | 11.186596656 | 1.700000000 |
| C | 4.375825457 | 12.606877694 | 1.700000000 |
| C | 3.145825997 | 13.317018214 | 1.700000000 |
| C | 5.605824917 | 14.737299253 | 1.700000000 |
| C | 4.375825457 | 15.447439772 | 1.700000000 |
| C | 6.835824377 | 16.867720811 | 1.700000000 |
| C | 5.605824917 | 17.577861331 | 1.700000000 |
| C | 6.835824377 | 19.708282889 | 1.700000000 |
| C | 1.915826536 | 12.606877694 | 1.700000000 |
| C | 3.145825997 | 14.737299253 | 1.700000000 |
| C | 1.915826536 | 15.447439772 | 1.700000000 |
| C | 4.375825457 | 16.867720811 | 1.700000000 |
| C | 3.145825997 | 17.577861331 | 1.700000000 |
| C | 5.605824917 | 18.998142369 | 1.700000000 |
| C | 4.375825457 | 19.708282889 | 1.700000000 |
| C | 6.835824377 | 21.128563928 | 1.700000000 |
| C | 5.605824917 | 21.838704447 | 1.700000000 |
| C | 6.835824377 | 23.969126006 | 1.700000000 |
| C | 1.915826536 | 16.867720811 | 1.700000000 |
| C | 3.145825997 | 18.998142369 | 1.700000000 |
| C | 1.915826536 | 19.708282889 | 1.700000000 |
| C | 4.375825457 | 21.128563928 | 1.700000000 |
| C | 3.145825997 | 21.838704447 | 1.700000000 |
| C | 5.605824917 | 23.258985486 | 1.700000000 |

|   |             |              |              |
|---|-------------|--------------|--------------|
| C | 4.375825457 | 23.969126006 | 1.700000000  |
| C | 6.835824377 | 25.389407044 | 1.700000000  |
| C | 5.605824917 | 26.099547564 | 1.700000000  |
| C | 6.835824377 | 28.229969122 | 1.700000000  |
| C | 1.915826536 | 21.128563928 | 1.700000000  |
| C | 3.145825997 | 23.258985486 | 1.700000000  |
| C | 1.915826536 | 23.969126006 | 1.700000000  |
| C | 3.145825997 | 26.099547564 | 1.700000000  |
| C | 5.605824917 | 27.519828603 | 1.700000000  |
| C | 4.375825457 | 28.229969122 | 1.700000000  |
| C | 1.915826536 | 25.389407044 | 1.700000000  |
| C | 3.145825997 | 27.519828603 | 1.700000000  |
| C | 1.915826536 | 28.229969122 | 1.700000000  |
| C | 4.328199517 | 25.433875401 | 1.733759177  |
| C | 7.628981123 | 21.473868519 | 17.773110901 |
| C | 7.813131123 | 21.067630729 | 19.101487606 |
| C | 6.376391123 | 21.400023734 | 17.162506082 |
| C | 6.734031123 | 20.556080414 | 19.825031218 |
| C | 5.485931123 | 20.470778264 | 19.219859566 |
| C | 6.645601123 | 15.746231662 | 11.281678139 |
| C | 7.866671123 | 15.497827920 | 11.907978830 |
| C | 8.072051123 | 14.325783601 | 12.645802049 |
| C | 7.054121123 | 13.373803089 | 12.733178917 |
| C | 5.830461123 | 13.620835477 | 12.116892186 |
| C | 5.594461123 | 14.811239751 | 11.399950934 |
| C | 4.110491123 | 16.982061754 | 9.740889684  |
| C | 4.454141123 | 18.018921200 | 10.629665229 |
| C | 4.285701123 | 19.641560533 | 8.849721639  |
| C | 3.952451123 | 18.619162556 | 7.949274286  |
| C | 3.836111123 | 17.314773471 | 8.397289728  |
| C | 4.543831123 | 19.346470075 | 10.192127906 |
| C | 3.315421123 | 21.005772454 | 14.055552582 |
| C | 3.847731123 | 23.030660363 | 12.871994021 |
| C | 4.199041123 | 23.632985925 | 14.089164629 |
| C | 4.149391123 | 22.914303452 | 15.280451986 |
| C | 3.395291123 | 21.704588178 | 12.854962898 |
| C | 4.007941123 | 24.257402038 | 5.279746362  |
| C | 4.084541123 | 25.409153155 | 6.075445546  |
| C | 4.271301123 | 26.643937402 | 5.427357399  |
| C | 4.368771123 | 26.720310789 | 4.034983810  |
| C | 4.281251123 | 25.571034100 | 3.233064480  |
| C | 4.112111123 | 24.351001784 | 3.899288840  |
| C | 4.009731123 | 24.311684570 | 8.347110484  |
| C | 3.949841123 | 23.563449981 | 10.468665889 |

|   |             |              |              |
|---|-------------|--------------|--------------|
| C | 4.202481123 | 22.113282008 | 8.790573773  |
| C | 3.714851123 | 21.574888386 | 15.280476913 |
| C | 5.273751123 | 20.899761048 | 17.894380837 |
| N | 4.282081123 | 14.800238348 | 10.829607440 |
| N | 3.722531123 | 15.663432005 | 10.106611987 |
| N | 3.915761123 | 20.627697752 | 17.519087090 |
| N | 3.322631123 | 20.837593063 | 16.431319211 |
| N | 3.880221123 | 24.621609201 | 9.663055909  |
| N | 4.097141123 | 22.275610827 | 10.112653954 |
| N | 4.175981123 | 23.067678458 | 7.863771234  |
| N | 3.976621123 | 25.376900242 | 7.483108666  |
| O | 3.890451123 | 23.901823271 | 11.782357096 |
| O | 4.364211123 | 20.890218709 | 8.237321040  |
| H | 0.609624773 | 9.395700232  | 1.341658957  |
| H | 3.321582339 | 9.386048343  | 1.417651779  |
| H | 5.596286727 | 9.354936170  | 1.495789437  |
| H | 6.735469197 | 29.365473777 | 1.687430847  |
| H | 4.408457668 | 29.363811046 | 1.586256432  |
| H | 1.879097310 | 29.363685724 | 1.586256432  |
| H | 8.801291123 | 21.145076600 | 19.561915264 |
| H | 6.270821123 | 21.728781966 | 16.130914168 |
| H | 8.483841123 | 21.856280714 | 17.211762949 |
| H | 6.862341123 | 20.216553761 | 20.854277516 |
| H | 9.031851123 | 14.152612174 | 13.138475768 |
| H | 7.219571123 | 12.432689948 | 13.260984817 |
| H | 6.517741123 | 16.661423168 | 10.711010781 |
| H | 8.680491123 | 16.219345097 | 11.810488855 |
| H | 3.901821123 | 26.274512097 | 7.961483878  |
| H | 4.643701123 | 17.801329687 | 11.684151428 |
| H | 3.746661123 | 18.883297384 | 6.910403261  |
| H | 3.514241123 | 16.521016317 | 7.720098926  |
| H | 4.807751123 | 20.140433074 | 10.889253667 |
| H | 2.907481123 | 19.993215554 | 14.068157987 |
| H | 4.503761123 | 24.680451008 | 14.085926653 |
| H | 4.402951123 | 23.406621586 | 16.220242826 |
| H | 3.087121123 | 21.228836328 | 11.929962913 |
| H | 3.888641123 | 23.286445620 | 5.746946858  |
| H | 4.352231123 | 27.563690918 | 6.012845128  |
| H | 4.515701123 | 27.697536435 | 3.574528630  |
| H | 4.059101123 | 23.419639665 | 3.339832103  |
| H | 4.626991123 | 20.048256894 | 19.741242962 |
| H | 5.012891123 | 12.900244235 | 12.154363284 |

*trans*-RGO-*bis*-AZO (1:54)

|   |             |              |             |
|---|-------------|--------------|-------------|
| C | 0.665823837 | 10.476456136 | 1.700000000 |
| C | 0.665823837 | 13.317018214 | 1.700000000 |
| C | 0.665823837 | 14.737299253 | 1.700000000 |
| C | 0.665823837 | 17.577861331 | 1.700000000 |
| C | 0.665823837 | 18.998142369 | 1.700000000 |
| C | 0.665823837 | 21.838704447 | 1.700000000 |
| C | 0.665823837 | 23.258985486 | 1.700000000 |
| C | 0.665823837 | 26.099547564 | 1.700000000 |
| C | 0.665823837 | 27.519828603 | 1.700000000 |
| C | 6.835824377 | 11.186596656 | 1.700000000 |
| C | 5.605824917 | 10.476456136 | 1.700000000 |
| C | 4.375825457 | 11.186596656 | 1.700000000 |
| C | 6.835824377 | 12.606877694 | 1.700000000 |
| C | 5.605824917 | 13.317018214 | 1.700000000 |
| C | 6.835824377 | 15.447439772 | 1.700000000 |
| C | 3.145825997 | 10.476456136 | 1.700000000 |
| C | 1.915826536 | 11.186596656 | 1.700000000 |
| C | 4.375825457 | 12.606877694 | 1.700000000 |
| C | 3.145825997 | 13.317018214 | 1.700000000 |
| C | 5.605824917 | 14.737299253 | 1.700000000 |
| C | 4.375825457 | 15.447439772 | 1.700000000 |
| C | 6.835824377 | 16.867720811 | 1.700000000 |
| C | 5.605824917 | 17.577861331 | 1.700000000 |
| C | 6.835824377 | 19.708282889 | 1.700000000 |
| C | 1.915826536 | 12.606877694 | 1.700000000 |
| C | 3.145825997 | 14.737299253 | 1.700000000 |
| C | 1.915826536 | 15.447439772 | 1.700000000 |
| C | 4.375825457 | 16.867720811 | 1.700000000 |
| C | 3.145825997 | 17.577861331 | 1.700000000 |
| C | 5.605824917 | 18.998142369 | 1.700000000 |
| C | 4.375825457 | 19.708282889 | 1.700000000 |
| C | 6.835824377 | 21.128563928 | 1.700000000 |
| C | 5.605824917 | 21.838704447 | 1.700000000 |
| C | 6.835824377 | 23.969126006 | 1.700000000 |
| C | 1.915826536 | 16.867720811 | 1.700000000 |
| C | 3.145825997 | 18.998142369 | 1.700000000 |
| C | 1.915826536 | 19.708282889 | 1.700000000 |
| C | 4.375825457 | 21.128563928 | 1.700000000 |
| C | 3.145825997 | 21.838704447 | 1.700000000 |
| C | 5.605824917 | 23.258985486 | 1.700000000 |
| C | 4.375825457 | 23.969126006 | 1.700000000 |
| C | 6.835824377 | 25.389407044 | 1.700000000 |



|   |             |              |              |
|---|-------------|--------------|--------------|
| C | 5.605824917 | 26.099547564 | 1.700000000  |
| C | 6.835824377 | 28.229969122 | 1.700000000  |
| C | 1.915826536 | 21.128563928 | 1.700000000  |
| C | 3.145825997 | 23.258985486 | 1.700000000  |
| C | 1.915826536 | 23.969126006 | 1.700000000  |
| C | 3.145825997 | 26.099547564 | 1.700000000  |
| C | 5.605824917 | 27.519828603 | 1.700000000  |
| C | 4.375825457 | 28.229969122 | 1.700000000  |
| C | 1.915826536 | 25.389407044 | 1.700000000  |
| C | 3.145825997 | 27.519828603 | 1.700000000  |
| C | 1.915826536 | 28.229969122 | 1.700000000  |
| C | 4.328199517 | 25.433875401 | 1.733759177  |
| C | 4.286489517 | 17.312997108 | 10.467023062 |
| C | 4.642119517 | 18.459435115 | 11.189011791 |
| C | 4.200589517 | 19.821087963 | 9.264311862  |
| C | 3.857869517 | 18.680326934 | 8.516339476  |
| C | 3.903819517 | 17.429581679 | 9.114856646  |
| C | 4.611669517 | 19.716589063 | 10.596739832 |
| C | 3.921989517 | 22.004374798 | 15.425681749 |
| C | 3.438639517 | 21.402940366 | 14.255296544 |
| C | 3.893409517 | 23.404888399 | 13.015447276 |
| C | 4.348539517 | 24.037773803 | 14.184355728 |
| C | 4.361909517 | 23.344480051 | 15.386966557 |
| C | 3.404359517 | 22.094931248 | 13.050300190 |
| C | 4.045259517 | 24.198972652 | 5.394980095  |
| C | 4.123469517 | 25.387315191 | 6.137564978  |
| C | 4.303729517 | 26.594897407 | 5.446698296  |
| C | 4.396519517 | 26.625225707 | 4.058412163  |
| C | 4.309919517 | 25.444251125 | 3.306188441  |
| C | 4.145749517 | 24.245891007 | 4.011707119  |
| C | 4.032329517 | 24.445382628 | 8.452980666  |
| C | 3.972909517 | 23.834438227 | 10.607978395 |
| C | 4.107539517 | 22.272770396 | 9.008941899  |
| C | 3.951259517 | 19.374239735 | 18.555864414 |
| C | 3.890319517 | 18.528348934 | 19.656286092 |
| C | 4.258909517 | 20.738437180 | 18.728041960 |
| C | 4.453389517 | 20.372474689 | 21.120541877 |
| C | 4.520929517 | 21.226832789 | 20.017883715 |
| C | 4.139419517 | 19.025046480 | 20.943263385 |
| C | 4.451959517 | 13.991688303 | 12.830949653 |
| C | 4.534679517 | 12.836191743 | 13.595677835 |
| C | 4.147589517 | 13.908244498 | 11.458851010 |
| C | 4.004069517 | 11.494584017 | 11.649822084 |
| C | 3.916979517 | 12.652741650 | 10.874893157 |

|   |             |              |              |
|---|-------------|--------------|--------------|
| C | 4.314299517 | 11.583850364 | 13.007468263 |
| N | 3.958759517 | 24.845291771 | 9.747873746  |
| N | 4.056339517 | 22.525477932 | 10.318389830 |
| N | 4.103829517 | 23.170605354 | 8.030216079  |
| N | 4.035359517 | 25.449878110 | 7.535692558  |
| N | 3.907279517 | 21.166312244 | 16.556376347 |
| N | 4.302319517 | 21.672295942 | 17.654505676 |
| N | 4.366429517 | 16.122260210 | 11.208273302 |
| N | 4.058039517 | 15.044376384 | 10.608976563 |
| O | 3.911059517 | 24.239682016 | 11.900397116 |
| O | 4.146779517 | 21.003520544 | 8.527160990  |
| H | 0.609624773 | 9.395700232  | 1.341658957  |
| H | 3.321582339 | 9.386048343  | 1.417651779  |
| H | 5.596286727 | 9.354936170  | 1.495789437  |
| H | 6.735469197 | 29.365473777 | 1.687430847  |
| H | 4.408457668 | 29.363811046 | 1.586256432  |
| H | 1.879097310 | 29.363685724 | 1.586256432  |
| H | 4.013449517 | 26.377660138 | 7.952205985  |
| H | 4.940119517 | 18.345378080 | 12.236297756 |
| H | 3.576979517 | 18.789132691 | 7.466170218  |
| H | 3.640409517 | 16.525332422 | 8.560236665  |
| H | 4.900499517 | 20.602166277 | 11.152381075 |
| H | 3.103199517 | 20.363488939 | 14.309727833 |
| H | 4.681659517 | 25.079015121 | 14.131795560 |
| H | 4.726149517 | 23.814042560 | 16.305617231 |
| H | 3.023069517 | 21.623135773 | 12.153627766 |
| H | 3.926199517 | 23.242803669 | 5.900850703  |
| H | 4.380529517 | 27.522488500 | 6.021661313  |
| H | 4.536779517 | 27.588733203 | 3.569988351  |
| H | 4.095819517 | 23.294131698 | 3.486238843  |
| H | 4.089609517 | 18.355960639 | 21.800008231 |
| H | 3.758219517 | 19.018034541 | 17.543427112 |
| H | 3.641439517 | 17.476040301 | 19.496522885 |
| H | 4.640419517 | 20.764566148 | 22.121387374 |
| H | 4.762299517 | 22.282165144 | 20.142218571 |
| H | 4.378739517 | 10.680384903 | 13.611358451 |
| H | 4.623129517 | 14.979797723 | 13.256961345 |
| H | 4.779649517 | 12.921807777 | 14.655278005 |
| H | 3.835429517 | 10.519928225 | 11.187810842 |
| H | 3.679469517 | 12.600354191 | 9.812104794  |

*cis*-RGO-*bis*-AZO\*\* (1:72)

|   |         |          |         |
|---|---------|----------|---------|
| C | 0.70204 | 10.50564 | 1.63250 |
|---|---------|----------|---------|

|   |         |          |         |
|---|---------|----------|---------|
| C | 0.70138 | 13.33155 | 1.71136 |
| C | 0.70051 | 14.76103 | 1.72052 |
| C | 0.70043 | 17.60893 | 1.64920 |
| C | 0.69950 | 19.03608 | 1.57194 |
| C | 0.70066 | 21.88413 | 1.42491 |
| C | 0.70447 | 23.31464 | 1.40347 |
| C | 0.69463 | 26.16538 | 1.30576 |
| C | 0.69857 | 27.59853 | 1.24881 |
| C | 6.82676 | 11.18474 | 1.63647 |
| C | 5.60030 | 10.50224 | 1.59627 |
| C | 4.37499 | 11.18915 | 1.60791 |
| C | 6.82435 | 12.62132 | 1.68136 |
| C | 5.59943 | 13.32950 | 1.68303 |
| C | 6.82630 | 15.47040 | 1.71160 |
| C | 3.15020 | 10.50481 | 1.59530 |
| C | 1.92545 | 11.19041 | 1.63621 |
| C | 4.37478 | 12.62397 | 1.65600 |
| C | 3.15059 | 13.33188 | 1.68247 |
| C | 5.60102 | 14.76131 | 1.70377 |
| C | 4.37534 | 15.46940 | 1.70535 |
| C | 6.82765 | 16.89936 | 1.68841 |
| C | 5.60215 | 17.60807 | 1.67151 |
| C | 6.82582 | 19.74532 | 1.54068 |
| C | 1.92654 | 12.62561 | 1.68090 |
| C | 3.15051 | 14.76150 | 1.70298 |
| C | 1.92481 | 15.47067 | 1.71102 |
| C | 4.37568 | 16.89960 | 1.69620 |
| C | 3.15022 | 17.60886 | 1.66574 |
| C | 5.60150 | 19.03619 | 1.59260 |
| C | 4.37519 | 19.74241 | 1.54246 |
| C | 6.82468 | 21.17288 | 1.46574 |
| C | 5.59845 | 21.87984 | 1.43111 |
| C | 6.82558 | 24.02301 | 1.48317 |
| C | 1.92486 | 16.89957 | 1.68409 |
| C | 3.14889 | 19.03488 | 1.58347 |
| C | 1.92520 | 19.74443 | 1.52655 |
| C | 4.37464 | 21.16867 | 1.44984 |
| C | 3.15125 | 21.88002 | 1.40398 |
| C | 5.59249 | 23.31157 | 1.46096 |
| C | 4.37343 | 24.00188 | 1.52155 |
| C | 6.82263 | 25.46289 | 1.46370 |
| C | 5.62291 | 26.17537 | 1.57482 |
| C | 6.82235 | 28.27901 | 1.27574 |
| C | 1.92501 | 21.17272 | 1.44078 |

|   |         |          |          |
|---|---------|----------|----------|
| C | 3.15705 | 23.31179 | 1.42021  |
| C | 1.92395 | 24.02322 | 1.43487  |
| C | 3.12011 | 26.17481 | 1.53380  |
| C | 5.60240 | 27.59048 | 1.41051  |
| C | 4.37216 | 28.27865 | 1.38086  |
| C | 1.92236 | 25.46293 | 1.41693  |
| C | 3.14341 | 27.59156 | 1.38700  |
| C | 1.92426 | 28.27766 | 1.25089  |
| C | 4.36399 | 25.44847 | 1.96414  |
| C | 4.07725 | 16.95757 | 9.84165  |
| C | 4.39948 | 17.92571 | 10.80915 |
| C | 4.40644 | 19.63391 | 9.11710  |
| C | 4.07896 | 18.68349 | 8.14144  |
| C | 3.88654 | 17.36162 | 8.50650  |
| C | 4.56388 | 19.26762 | 10.45590 |
| C | 3.17035 | 20.92949 | 14.32295 |
| C | 3.81888 | 22.95666 | 13.20362 |
| C | 4.16787 | 23.51549 | 14.44175 |
| C | 4.04976 | 22.77185 | 15.61188 |
| C | 3.30497 | 21.65680 | 13.14316 |
| C | 3.97345 | 24.16451 | 5.65199  |
| C | 4.10475 | 25.32854 | 6.42195  |
| C | 4.30621 | 26.54542 | 5.74026  |
| C | 4.39904 | 26.59053 | 4.34666  |
| C | 4.29283 | 25.42254 | 3.57307  |
| C | 4.07466 | 24.22381 | 4.26376  |
| C | 4.10940 | 24.29361 | 8.71151  |
| C | 4.03145 | 23.53413 | 10.82598 |
| C | 4.37121 | 22.10562 | 9.14862  |
| C | 3.57750 | 21.44642 | 15.56641 |
| C | 5.22168 | 20.78420 | 18.05575 |
| C | 8.05380 | 10.50127 | 1.62717  |
| C | 8.05004 | 13.32899 | 1.71008  |
| C | 8.04983 | 14.75996 | 1.71962  |
| C | 8.05107 | 17.60907 | 1.65248  |
| C | 8.05120 | 19.03656 | 1.57886  |
| C | 8.04907 | 21.88435 | 1.44463  |
| C | 8.04531 | 23.31452 | 1.43086  |
| C | 8.04972 | 26.16592 | 1.33531  |
| C | 8.04843 | 27.60030 | 1.27290  |
| C | 9.27641 | 11.18802 | 1.66272  |
| C | 9.27597 | 12.62379 | 1.70487  |
| C | 9.27547 | 15.46984 | 1.71713  |
| C | 9.27584 | 16.89963 | 1.67636  |

|   |         |          |          |
|---|---------|----------|----------|
| C | 9.27531 | 19.74663 | 1.53216  |
| C | 9.27516 | 21.17612 | 1.45927  |
| C | 9.27425 | 24.02412 | 1.38639  |
| C | 9.27214 | 25.45653 | 1.32972  |
| C | 9.27434 | 28.28607 | 1.22077  |
| C | 7.54858 | 21.34341 | 17.64881 |
| C | 7.85447 | 21.10627 | 18.99458 |
| C | 6.24865 | 21.18266 | 17.17435 |
| C | 6.84928 | 20.68860 | 19.87080 |
| C | 5.54779 | 20.52218 | 19.40235 |
| C | 6.62314 | 15.70079 | 11.12407 |
| C | 7.87004 | 15.48526 | 11.70782 |
| C | 8.09307 | 14.38377 | 12.54380 |
| C | 7.05691 | 13.48041 | 12.79244 |
| C | 5.81002 | 13.68732 | 12.21001 |
| C | 5.56610 | 14.80254 | 11.38487 |
| N | 4.24150 | 14.75665 | 10.83651 |
| N | 3.66654 | 15.62687 | 10.13643 |
| N | 3.85749 | 20.45295 | 17.76393 |
| N | 3.21780 | 20.65679 | 16.69798 |
| N | 3.95914 | 24.59607 | 10.02563 |
| N | 4.23264 | 22.25133 | 10.47058 |
| N | 4.32773 | 23.06273 | 8.22829  |
| N | 4.02448 | 25.33902 | 7.83292  |
| O | 3.90277 | 23.85628 | 12.13894 |
| O | 4.58944 | 20.90186 | 8.57643  |
| H | 0.70344 | 9.41517  | 1.58454  |
| H | 3.14764 | 9.41194  | 1.57917  |
| H | 5.59583 | 9.40866  | 1.57306  |
| H | 6.80720 | 29.36718 | 1.18717  |
| H | 4.37440 | 29.36496 | 1.26080  |
| H | 1.93452 | 29.36801 | 1.18519  |
| H | 3.91302 | 26.24145 | 8.29134  |
| H | 4.51845 | 17.62627 | 11.85179 |
| H | 3.94962 | 19.01515 | 7.11013  |
| H | 3.57427 | 16.61961 | 7.76901  |
| H | 4.81095 | 20.01861 | 11.20258 |
| H | 2.71767 | 19.93644 | 14.29997 |
| H | 4.52322 | 24.54612 | 14.46951 |
| H | 4.30325 | 23.22352 | 16.57218 |
| H | 2.99048 | 21.22324 | 12.19841 |
| H | 3.81477 | 23.20072 | 6.12650  |
| H | 4.40171 | 27.48407 | 6.29404  |
| H | 4.56707 | 27.56022 | 3.87130  |

|   |         |          |          |
|---|---------|----------|----------|
| H | 3.98184 | 23.28246 | 3.72736  |
| H | 4.75114 | 20.16246 | 20.05733 |
| H | 4.98755 | 12.98432 | 12.35554 |
| H | 8.06259 | 9.41048  | 1.56610  |
| H | 9.27596 | 29.38055 | 1.20934  |
| H | 8.88001 | 21.22880 | 19.34947 |
| H | 6.03936 | 21.36193 | 16.12278 |
| H | 8.33647 | 21.65709 | 16.96084 |
| H | 7.08576 | 20.47101 | 20.91477 |
| H | 9.07826 | 14.22697 | 12.98742 |
| H | 7.22502 | 12.60727 | 13.42662 |
| H | 6.48082 | 16.55957 | 10.47214 |
| H | 8.68202 | 16.18893 | 11.51282 |

*trans*-RGO-bis-AZO\*\* (1:72)

|   |         |          |         |
|---|---------|----------|---------|
| C | 0.70231 | 10.49692 | 1.63923 |
| C | 6.82634 | 11.17290 | 1.63736 |
| C | 0.70135 | 13.32264 | 1.71169 |
| C | 5.60018 | 10.49011 | 1.59638 |
| C | 4.37542 | 11.17838 | 1.60738 |
| C | 6.82422 | 12.61013 | 1.67916 |
| C | 5.59953 | 13.31954 | 1.67685 |
| C | 0.70101 | 14.75238 | 1.71939 |
| C | 6.82635 | 15.46089 | 1.70514 |
| C | 0.70135 | 17.60030 | 1.63849 |
| C | 3.14986 | 10.49553 | 1.59823 |
| C | 1.92573 | 11.18194 | 1.64024 |
| C | 4.37562 | 12.61429 | 1.65086 |
| C | 3.15166 | 13.32297 | 1.67702 |
| C | 5.60137 | 14.75134 | 1.69632 |
| C | 4.37702 | 15.46128 | 1.69740 |
| C | 6.82823 | 16.89057 | 1.67879 |
| C | 5.60344 | 17.59966 | 1.66631 |
| C | 0.70026 | 19.02712 | 1.56299 |
| C | 6.82801 | 19.73684 | 1.53909 |
| C | 0.70357 | 21.87588 | 1.43000 |
| C | 1.92704 | 12.61717 | 1.67997 |
| C | 3.15191 | 14.75347 | 1.69630 |
| C | 1.92563 | 15.46214 | 1.70545 |
| C | 4.37742 | 16.89097 | 1.69022 |
| C | 3.15201 | 17.59983 | 1.66303 |
| C | 5.60363 | 19.02807 | 1.59486 |
| C | 4.37706 | 19.73438 | 1.55163 |

|   |         |          |          |
|---|---------|----------|----------|
| C | 6.82692 | 21.16473 | 1.46818  |
| C | 5.60074 | 21.87113 | 1.44311  |
| C | 0.70832 | 23.30634 | 1.40556  |
| C | 6.82922 | 24.01489 | 1.46634  |
| C | 0.69889 | 26.15695 | 1.28924  |
| C | 1.92614 | 16.89098 | 1.67676  |
| C | 3.15065 | 19.02681 | 1.58904  |
| C | 1.92614 | 19.73563 | 1.52981  |
| C | 4.37696 | 21.16052 | 1.46763  |
| C | 3.15393 | 21.87125 | 1.42787  |
| C | 5.59569 | 23.30283 | 1.46573  |
| C | 4.37805 | 23.99465 | 1.53129  |
| C | 6.82743 | 25.45483 | 1.43130  |
| C | 5.62874 | 26.16940 | 1.53471  |
| C | 0.70290 | 27.58894 | 1.22216  |
| C | 6.82815 | 28.26923 | 1.21264  |
| C | 1.92733 | 21.16440 | 1.45298  |
| C | 3.16076 | 23.30335 | 1.44345  |
| C | 1.92780 | 24.01565 | 1.44294  |
| C | 3.12530 | 26.16848 | 1.51657  |
| C | 5.60817 | 27.58216 | 1.35298  |
| C | 4.37743 | 28.26859 | 1.31596  |
| C | 1.92708 | 25.45569 | 1.41116  |
| C | 3.14823 | 27.58261 | 1.34820  |
| C | 1.92844 | 28.26800 | 1.21466  |
| C | 4.37382 | 25.44904 | 1.94729  |
| C | 4.38726 | 17.31614 | 10.63819 |
| C | 4.82547 | 18.43981 | 11.35868 |
| C | 4.28658 | 19.86682 | 9.51510  |
| C | 3.85517 | 18.75488 | 8.77094  |
| C | 3.90136 | 17.48438 | 9.32483  |
| C | 4.78441 | 19.72088 | 10.81225 |
| C | 3.84159 | 21.86470 | 15.62128 |
| C | 3.23240 | 21.36189 | 14.46104 |
| C | 3.77454 | 23.37002 | 13.26474 |
| C | 4.37530 | 23.89764 | 14.41778 |
| C | 4.40816 | 23.15445 | 15.59053 |
| C | 3.17747 | 22.10685 | 13.28592 |
| C | 4.05321 | 24.25562 | 5.66678  |
| C | 4.13672 | 25.44614 | 6.40097  |
| C | 4.31908 | 26.64664 | 5.68676  |
| C | 4.41298 | 26.65284 | 4.29535  |
| C | 4.32688 | 25.46044 | 3.55603  |
| C | 4.15322 | 24.27580 | 4.27859  |

|   |         |          |          |
|---|---------|----------|----------|
| C | 4.02269 | 24.48638 | 8.72752  |
| C | 3.88929 | 23.85358 | 10.87909 |
| C | 4.14739 | 22.31415 | 9.28507  |
| C | 3.93647 | 19.21081 | 18.81874 |
| C | 3.92827 | 18.41899 | 19.96197 |
| C | 4.22499 | 20.58603 | 18.92238 |
| C | 4.50074 | 20.34083 | 21.32170 |
| C | 4.51906 | 21.14054 | 20.17911 |
| C | 4.20223 | 18.98014 | 21.21739 |
| C | 4.46969 | 13.87208 | 12.89406 |
| C | 4.52192 | 12.67126 | 13.59111 |
| C | 4.17000 | 13.87446 | 11.51801 |
| C | 3.97454 | 11.45616 | 11.56763 |
| C | 3.91273 | 12.65934 | 10.86194 |
| C | 4.27949 | 11.45816 | 12.93154 |
| C | 8.05412 | 10.49084 | 1.63127  |
| C | 8.04934 | 13.31859 | 1.70989  |
| C | 8.05037 | 14.75025 | 1.71818  |
| C | 8.05230 | 17.60051 | 1.64008  |
| C | 9.27657 | 11.17873 | 1.66772  |
| C | 8.05296 | 19.02822 | 1.56738  |
| C | 8.05216 | 21.87619 | 1.44168  |
| C | 9.27648 | 12.61443 | 1.70684  |
| C | 9.27534 | 15.46094 | 1.71495  |
| C | 8.04897 | 23.30648 | 1.41961  |
| C | 8.05447 | 26.15693 | 1.30029  |
| C | 9.27666 | 16.89016 | 1.66659  |
| C | 9.27755 | 19.73793 | 1.52380  |
| C | 8.05381 | 27.59075 | 1.22687  |
| C | 9.27795 | 21.16756 | 1.45812  |
| C | 9.27837 | 24.01604 | 1.37675  |
| C | 9.27668 | 25.44787 | 1.31144  |
| C | 9.27952 | 28.27667 | 1.18470  |
| N | 3.87536 | 24.87030 | 10.02181 |
| N | 4.03003 | 22.54763 | 10.59334 |
| N | 4.15803 | 23.21746 | 8.30946  |
| N | 4.03280 | 25.49881 | 7.80801  |
| N | 3.82190 | 20.99659 | 16.73622 |
| N | 4.24856 | 21.48842 | 17.82676 |
| N | 4.47476 | 16.09911 | 11.34350 |
| N | 4.08943 | 15.05536 | 10.73005 |
| O | 3.75896 | 24.24299 | 12.17384 |
| O | 4.24372 | 21.05506 | 8.79380  |
| H | 3.96855 | 26.42045 | 8.23851  |



|   |         |          |          |
|---|---------|----------|----------|
| H | 5.20221 | 18.28060 | 12.37133 |
| H | 3.49072 | 18.91974 | 7.75464  |
| H | 3.56440 | 16.61431 | 8.75990  |
| H | 5.11694 | 20.58416 | 11.38148 |
| H | 2.79003 | 20.36524 | 14.50041 |
| H | 4.81242 | 24.89668 | 14.36998 |
| H | 4.87212 | 23.54971 | 16.49460 |
| H | 2.70055 | 21.70176 | 12.39939 |
| H | 3.92184 | 23.31005 | 6.18124  |
| H | 4.39064 | 27.59936 | 6.21853  |
| H | 4.55778 | 27.61072 | 3.79239  |
| H | 4.09203 | 23.31623 | 3.77072  |
| H | 4.18667 | 18.35261 | 22.11127 |
| H | 3.72495 | 18.78807 | 17.83619 |
| H | 3.70841 | 17.35152 | 19.88170 |
| H | 4.72183 | 20.77829 | 22.29697 |
| H | 4.75189 | 22.20519 | 20.23800 |
| H | 4.32365 | 10.51838 | 13.48670 |
| H | 4.65341 | 14.82540 | 13.38926 |
| H | 4.75123 | 12.67630 | 14.65950 |
| H | 3.78143 | 10.51192 | 11.05409 |
| H | 3.67131 | 12.67815 | 9.79724  |
| H | 0.70542 | 9.40668  | 1.59386  |
| H | 3.14413 | 9.40245  | 1.58057  |
| H | 5.59619 | 9.39703  | 1.57258  |
| H | 6.81334 | 29.35698 | 1.11697  |
| H | 4.37680 | 29.35323 | 1.18417  |
| H | 1.93879 | 29.35825 | 1.13783  |
| H | 8.06346 | 9.39921  | 1.57212  |
| H | 9.28071 | 29.36929 | 1.16436  |

*cis*-RGO-*bis*-AZO\* (1:90)

|   |         |          |         |
|---|---------|----------|---------|
| C | 0.68893 | 10.48471 | 1.60190 |
| C | 0.68670 | 13.32222 | 1.66521 |
| C | 0.68828 | 14.74624 | 1.71199 |
| C | 0.69270 | 17.59827 | 1.73921 |
| C | 0.69206 | 19.01961 | 1.70293 |
| C | 0.69100 | 21.86831 | 1.55115 |
| C | 0.69760 | 23.29312 | 1.51597 |
| C | 0.68600 | 26.14768 | 1.49432 |
| C | 0.69041 | 27.58982 | 1.49835 |
| C | 6.83719 | 11.16507 | 1.61774 |
| C | 5.60663 | 10.48332 | 1.59706 |

|   |         |          |         |
|---|---------|----------|---------|
| C | 4.37584 | 11.16535 | 1.62055 |
| C | 6.83784 | 12.60933 | 1.65638 |
| C | 5.60732 | 13.32089 | 1.68809 |
| C | 6.83944 | 15.45930 | 1.73217 |
| C | 3.14732 | 10.48250 | 1.60045 |
| C | 1.91883 | 11.16684 | 1.61752 |
| C | 4.37589 | 12.60991 | 1.67201 |
| C | 3.14688 | 13.32256 | 1.68854 |
| C | 5.60919 | 14.74593 | 1.72100 |
| C | 4.37977 | 15.45978 | 1.72581 |
| C | 6.84190 | 16.88022 | 1.73033 |
| C | 5.61189 | 17.59465 | 1.68377 |
| C | 6.84045 | 19.73155 | 1.62163 |
| C | 1.91737 | 12.61075 | 1.65693 |
| C | 3.14801 | 14.74798 | 1.71716 |
| C | 1.91638 | 15.46045 | 1.72448 |
| C | 4.38207 | 16.87916 | 1.69551 |
| C | 3.15153 | 17.59336 | 1.67059 |
| C | 5.60824 | 19.01383 | 1.60580 |
| C | 4.37956 | 19.72529 | 1.52295 |
| C | 6.84055 | 21.15231 | 1.54405 |
| C | 5.60926 | 21.86229 | 1.43865 |
| C | 6.84273 | 24.00296 | 1.55959 |
| C | 1.91957 | 16.88062 | 1.71818 |
| C | 3.15152 | 19.01300 | 1.59001 |
| C | 1.92024 | 19.73199 | 1.59698 |
| C | 4.37881 | 21.14683 | 1.42619 |
| C | 3.14792 | 21.86120 | 1.39766 |
| C | 5.60550 | 23.28688 | 1.45880 |
| C | 4.38160 | 23.98383 | 1.47370 |
| C | 6.84165 | 25.44071 | 1.56192 |
| C | 5.63706 | 26.15653 | 1.58632 |
| C | 6.85038 | 28.26550 | 1.40937 |
| C | 1.91555 | 21.15159 | 1.50237 |
| C | 3.15644 | 23.28784 | 1.40531 |
| C | 1.91826 | 24.00224 | 1.48640 |
| C | 3.12404 | 26.15406 | 1.53934 |
| C | 5.62137 | 27.57911 | 1.42872 |
| C | 4.38353 | 28.26347 | 1.34731 |
| C | 1.91954 | 25.43986 | 1.49365 |
| C | 3.14565 | 27.58031 | 1.40549 |
| C | 1.91930 | 28.26897 | 1.38865 |
| C | 4.37372 | 25.42219 | 1.93977 |
| C | 4.09685 | 16.96715 | 9.77654 |

|   |          |          |          |
|---|----------|----------|----------|
| C | 4.43727  | 17.96253 | 10.70756 |
| C | 4.33822  | 19.64492 | 8.98780  |
| C | 4.01269  | 18.66201 | 8.04061  |
| C | 3.86613  | 17.34288 | 8.43942  |
| C | 4.55766  | 19.30070 | 10.32478 |
| C | 3.24463  | 20.94341 | 14.21548 |
| C | 3.83466  | 22.98202 | 13.09369 |
| C | 4.20146  | 23.55052 | 14.32073 |
| C | 4.10957  | 22.80759 | 15.49227 |
| C | 3.35202  | 21.67007 | 13.03582 |
| C | 3.97868  | 24.16579 | 5.59492  |
| C | 4.08235  | 25.34456 | 6.34265  |
| C | 4.28011  | 26.55983 | 5.66413  |
| C | 4.38416  | 26.59182 | 4.27601  |
| C | 4.29991  | 25.40559 | 3.52374  |
| C | 4.09951  | 24.20874 | 4.21540  |
| C | 4.07004  | 24.31778 | 8.61323  |
| C | 3.99052  | 23.54309 | 10.71523 |
| C | 4.29148  | 22.11903 | 9.02550  |
| C | 3.63776  | 21.48241 | 15.45250 |
| C | 5.23488  | 20.84808 | 17.97538 |
| C | 8.06842  | 10.48388 | 1.60653  |
| C | 8.06948  | 13.32134 | 1.66633  |
| C | 8.07112  | 14.74647 | 1.71631  |
| C | 8.07321  | 17.59632 | 1.74885  |
| C | 8.07086  | 19.01921 | 1.72246  |
| C | 8.06754  | 21.86850 | 1.59609  |
| C | 8.06575  | 23.29518 | 1.57863  |
| C | 8.07896  | 26.14538 | 1.54301  |
| C | 8.07826  | 27.58836 | 1.52479  |
| C | 11.75674 | 11.16500 | 1.60588  |
| C | 10.52648 | 10.48308 | 1.59851  |
| C | 9.29797  | 11.16755 | 1.60923  |
| C | 11.75679 | 12.60986 | 1.63237  |
| C | 10.52858 | 13.32091 | 1.65996  |
| C | 11.75975 | 15.45966 | 1.73765  |
| C | 9.29904  | 12.61129 | 1.63507  |
| C | 10.53131 | 14.74335 | 1.72365  |
| C | 9.30312  | 15.45893 | 1.74224  |
| C | 11.76335 | 16.88087 | 1.76112  |
| C | 10.53489 | 17.59793 | 1.77460  |
| C | 11.76259 | 19.73777 | 1.71565  |
| C | 9.30431  | 16.88120 | 1.76503  |
| C | 10.53337 | 19.02084 | 1.76039  |

|   |          |          |          |
|---|----------|----------|----------|
| C | 9.30201  | 19.73692 | 1.73191  |
| C | 11.76212 | 21.15754 | 1.64750  |
| C | 10.53095 | 21.87140 | 1.64661  |
| C | 11.76255 | 24.00848 | 1.53547  |
| C | 9.29920  | 21.15740 | 1.66925  |
| C | 10.53279 | 23.29723 | 1.58279  |
| C | 9.30275  | 24.00801 | 1.57326  |
| C | 10.53366 | 26.14589 | 1.55289  |
| C | 11.76543 | 28.27279 | 1.59856  |
| C | 9.30514  | 25.43385 | 1.55451  |
| C | 10.53486 | 27.58853 | 1.60225  |
| C | 9.30576  | 28.27320 | 1.60626  |
| C | 11.76172 | 25.43422 | 1.52327  |
| C | 7.57351  | 21.43380 | 17.70119 |
| C | 7.82814  | 21.09647 | 19.03619 |
| C | 6.29356  | 21.30990 | 17.16095 |
| C | 6.79033  | 20.62631 | 19.84337 |
| C | 5.51125  | 20.50241 | 19.31207 |
| C | 6.62771  | 15.73866 | 11.20898 |
| C | 7.86241  | 15.50504 | 11.81279 |
| C | 8.07959  | 14.36173 | 12.59124 |
| C | 7.05151  | 13.43145 | 12.75813 |
| C | 5.81449  | 13.66096 | 12.16253 |
| C | 5.57470  | 14.81699 | 11.39307 |
| N | 4.25519  | 14.78573 | 10.83065 |
| N | 3.69226  | 15.64609 | 10.10889 |
| N | 3.87360  | 20.52523 | 17.66020 |
| N | 3.25561  | 20.71469 | 16.58284 |
| N | 3.92608  | 24.61194 | 9.92600  |
| N | 4.15812  | 22.25741 | 10.34848 |
| N | 4.27993  | 23.08887 | 8.12056  |
| N | 3.98700  | 25.36719 | 7.74503  |
| O | 3.88580  | 23.87283 | 12.02585 |
| O | 4.45336  | 20.91395 | 8.43173  |
| H | 0.69939  | 9.39142  | 1.59352  |
| H | 3.14340  | 9.39072  | 1.59133  |
| H | 5.60815  | 9.39017  | 1.57876  |
| H | 6.84902  | 29.35282 | 1.30589  |
| H | 4.38403  | 29.35237 | 1.24333  |
| H | 1.91900  | 29.36025 | 1.31109  |
| H | 3.89163  | 26.27455 | 8.19663  |
| H | 4.60133  | 17.69585 | 11.75201 |
| H | 3.84480  | 18.95724 | 7.00252  |
| H | 3.55690  | 16.57643 | 7.72632  |

|   |          |          |          |
|---|----------|----------|----------|
| H | 4.81804  | 20.06308 | 11.05669 |
| H | 2.82736  | 19.93489 | 14.19814 |
| H | 4.54884  | 24.58511 | 14.34111 |
| H | 4.38818  | 23.26465 | 16.44234 |
| H | 3.04198  | 21.23791 | 12.08875 |
| H | 3.82548  | 23.21760 | 6.09644  |
| H | 4.35406  | 27.49105 | 6.23364  |
| H | 4.53469  | 27.55409 | 3.78017  |
| H | 4.03327  | 23.26616 | 3.67978  |
| H | 4.67812  | 20.11074 | 19.89901 |
| H | 4.99334  | 12.94706 | 12.25199 |
| H | 8.06949  | 9.39011  | 1.60442  |
| H | 10.52211 | 9.39121  | 1.57372  |
| H | 11.76527 | 29.36297 | 1.67078  |
| H | 9.30296  | 29.36507 | 1.68557  |
| H | 8.83753  | 21.18923 | 19.43919 |
| H | 6.13264  | 21.57333 | 16.11749 |
| H | 8.38835  | 21.80139 | 17.07236 |
| H | 6.97896  | 20.33786 | 20.87906 |
| H | 9.05252  | 14.19562 | 13.05639 |
| H | 7.21703  | 12.52104 | 13.33792 |
| H | 6.49251  | 16.63080 | 10.60172 |
| H | 8.66965  | 16.22774 | 11.67519 |

*trans*-RGO-bis-AZO\* (1:90)

|   |         |          |         |
|---|---------|----------|---------|
| C | 0.68737 | 10.46491 | 1.59832 |
| C | 6.84078 | 11.14887 | 1.61693 |
| C | 0.69095 | 13.30178 | 1.67215 |
| C | 5.61022 | 10.46583 | 1.59953 |
| C | 4.38096 | 11.15028 | 1.61362 |
| C | 6.84161 | 12.59157 | 1.65657 |
| C | 5.61178 | 13.30254 | 1.68746 |
| C | 0.69127 | 14.72777 | 1.71356 |
| C | 6.84116 | 15.44356 | 1.73491 |
| C | 0.69104 | 17.58401 | 1.73542 |
| C | 3.15238 | 10.46641 | 1.60144 |
| C | 1.91991 | 11.14705 | 1.61233 |
| C | 4.38084 | 12.59166 | 1.65987 |
| C | 3.14997 | 13.30140 | 1.68630 |
| C | 5.61118 | 14.72827 | 1.73128 |
| C | 4.38110 | 15.44266 | 1.74572 |
| C | 6.84088 | 16.86675 | 1.73551 |
| C | 5.61100 | 17.58191 | 1.70535 |

|   |         |          |          |
|---|---------|----------|----------|
| C | 0.69207 | 19.00340 | 1.70279  |
| C | 6.84343 | 19.71656 | 1.63326  |
| C | 0.69543 | 21.85440 | 1.58519  |
| C | 1.92003 | 12.59017 | 1.65258  |
| C | 3.15073 | 14.72829 | 1.73246  |
| C | 1.92012 | 15.44429 | 1.73429  |
| C | 4.38119 | 16.86588 | 1.72826  |
| C | 3.15060 | 17.58166 | 1.70402  |
| C | 5.61076 | 19.00096 | 1.62992  |
| C | 4.38237 | 19.71081 | 1.56087  |
| C | 6.84512 | 21.13712 | 1.55550  |
| C | 5.61474 | 21.85062 | 1.45724  |
| C | 0.69900 | 23.28472 | 1.56868  |
| C | 6.84605 | 23.99589 | 1.57071  |
| C | 0.68515 | 26.14123 | 1.51893  |
| C | 1.91998 | 16.86676 | 1.73175  |
| C | 3.15163 | 19.00061 | 1.62351  |
| C | 1.92052 | 19.71774 | 1.61687  |
| C | 4.38365 | 21.13349 | 1.45670  |
| C | 3.15321 | 21.85001 | 1.43058  |
| C | 5.60819 | 23.27774 | 1.48065  |
| C | 4.38542 | 23.97454 | 1.50870  |
| C | 6.84624 | 25.43519 | 1.55579  |
| C | 5.64153 | 26.15014 | 1.57175  |
| C | 0.68837 | 27.58186 | 1.53580  |
| C | 6.84968 | 28.26592 | 1.44850  |
| C | 1.92056 | 21.13707 | 1.52605  |
| C | 3.16130 | 23.27860 | 1.44293  |
| C | 1.92119 | 23.99462 | 1.51965  |
| C | 4.38110 | 25.42280 | 1.94254  |
| C | 3.12247 | 26.15163 | 1.54962  |
| C | 5.62211 | 27.57516 | 1.44512  |
| C | 4.38277 | 28.26013 | 1.38809  |
| C | 1.92081 | 25.43415 | 1.51245  |
| C | 3.14311 | 27.57982 | 1.44029  |
| C | 1.91447 | 28.26603 | 1.44535  |
| C | 4.31077 | 17.30094 | 10.50805 |
| C | 4.70572 | 18.43810 | 11.22871 |
| C | 4.23538 | 19.83454 | 9.34694  |
| C | 3.86246 | 18.70498 | 8.59307  |
| C | 3.89956 | 17.44182 | 9.16640  |
| C | 4.68577 | 19.70457 | 10.66050 |
| C | 3.89946 | 21.95066 | 15.50889 |
| C | 3.37230 | 21.37880 | 14.34331 |

|   |          |          |          |
|---|----------|----------|----------|
| C | 3.84405  | 23.38897 | 13.14828 |
| C | 4.36190  | 23.98665 | 14.31106 |
| C | 4.38614  | 23.27094 | 15.49484 |
| C | 3.32136  | 22.09447 | 13.15825 |
| C | 4.05029  | 24.23178 | 5.61146  |
| C | 4.12207  | 25.42903 | 6.33464  |
| C | 4.30399  | 26.63211 | 5.63232  |
| C | 4.40869  | 26.63050 | 4.24692  |
| C | 4.33413  | 25.43421 | 3.51669  |
| C | 4.16455  | 24.24725 | 4.22970  |
| C | 4.01428  | 24.46471 | 8.62494  |
| C | 3.93016  | 23.82347 | 10.75984 |
| C | 4.11484  | 22.28553 | 9.15080  |
| C | 3.94145  | 19.32285 | 18.62344 |
| C | 3.90199  | 18.49869 | 19.73822 |
| C | 4.24263  | 20.68753 | 18.78234 |
| C | 4.46774  | 20.37899 | 21.16749 |
| C | 4.51587  | 21.21187 | 20.05114 |
| C | 4.16027  | 19.02398 | 21.01351 |
| C | 4.46092  | 13.94784 | 12.86566 |
| C | 4.53084  | 12.77320 | 13.60326 |
| C | 4.15716  | 13.89274 | 11.49152 |
| C | 3.99579  | 11.47909 | 11.62406 |
| C | 3.91966  | 12.65510 | 10.87729 |
| C | 4.30147  | 11.53458 | 12.98632 |
| C | 8.06907  | 10.46340 | 1.60667  |
| C | 8.07202  | 13.30128 | 1.67413  |
| C | 11.75933 | 11.15040 | 1.60716  |
| C | 8.07084  | 14.72670 | 1.71539  |
| C | 8.07031  | 17.58325 | 1.74478  |
| C | 10.53241 | 10.46357 | 1.58895  |
| C | 9.30048  | 11.14428 | 1.61084  |
| C | 11.75957 | 12.59194 | 1.64427  |
| C | 10.52863 | 13.30226 | 1.66110  |
| C | 11.75957 | 15.44392 | 1.72408  |
| C | 8.07120  | 19.00350 | 1.71580  |
| C | 8.07102  | 21.85519 | 1.61798  |
| C | 9.29926  | 12.58953 | 1.64512  |
| C | 10.52889 | 14.72837 | 1.70340  |
| C | 9.29933  | 15.44504 | 1.72696  |
| C | 11.76004 | 16.86682 | 1.75166  |
| C | 10.52868 | 17.58339 | 1.77255  |
| C | 11.76127 | 19.71928 | 1.72356  |
| C | 8.06819  | 23.28461 | 1.61035  |

|   |          |          |          |
|---|----------|----------|----------|
| C | 8.08038  | 26.14455 | 1.55675  |
| C | 9.29854  | 16.86840 | 1.75820  |
| C | 10.52962 | 19.00403 | 1.76755  |
| C | 9.29965  | 19.71992 | 1.73385  |
| C | 11.76396 | 21.14021 | 1.67894  |
| C | 10.53232 | 21.85706 | 1.69373  |
| C | 11.76106 | 24.00150 | 1.60999  |
| C | 8.07765  | 27.58511 | 1.55593  |
| C | 9.29997  | 21.14103 | 1.69438  |
| C | 10.53310 | 23.28671 | 1.65622  |
| C | 9.30320  | 24.00070 | 1.63529  |
| C | 11.76057 | 25.42932 | 1.57531  |
| C | 10.53186 | 26.14039 | 1.59843  |
| C | 11.76249 | 28.26827 | 1.63029  |
| C | 9.30377  | 25.42845 | 1.59987  |
| C | 10.53105 | 27.58435 | 1.62774  |
| C | 9.30229  | 28.26965 | 1.64231  |
| N | 3.90871  | 24.84458 | 9.91628  |
| N | 4.04160  | 22.51563 | 10.46382 |
| N | 4.11343  | 23.19808 | 8.18835  |
| N | 4.01927  | 25.48825 | 7.72901  |
| N | 3.87797  | 21.09990 | 16.61996 |
| N | 4.28554  | 21.60466 | 17.70897 |
| N | 4.37998  | 16.10996 | 11.25365 |
| N | 4.06831  | 15.03650 | 10.65381 |
| O | 3.84320  | 24.23152 | 12.04679 |
| O | 4.17247  | 21.02896 | 8.63910  |
| H | 3.97764  | 26.40873 | 8.16143  |
| H | 5.02970  | 18.29155 | 12.25953 |
| H | 3.55142  | 18.84476 | 7.55670  |
| H | 3.61126  | 16.55626 | 8.59539  |
| H | 4.99693  | 20.57536 | 11.22802 |
| H | 3.00492  | 20.35337 | 14.40431 |
| H | 4.73871  | 25.00937 | 14.25665 |
| H | 4.77989  | 23.70190 | 16.41815 |
| H | 2.90968  | 21.64472 | 12.25991 |
| H | 3.92615  | 23.29004 | 6.13441  |
| H | 4.37758  | 27.57949 | 6.17303  |
| H | 4.55329  | 27.58508 | 3.74602  |
| H | 4.11689  | 23.28865 | 3.72037  |
| H | 4.12247  | 18.36807 | 21.88586 |
| H | 3.74086  | 18.94834 | 17.61924 |
| H | 3.66692  | 17.43870 | 19.61812 |
| H | 4.66833  | 20.78535 | 22.16007 |



|   |          |          |          |
|---|----------|----------|----------|
| H | 4.74976  | 22.27489 | 20.12715 |
| H | 4.36058  | 10.61601 | 13.57466 |
| H | 4.63806  | 14.92046 | 13.32532 |
| H | 4.76657  | 12.81664 | 14.66941 |
| H | 3.81667  | 10.51507 | 11.14394 |
| H | 3.68310  | 12.64167 | 9.81235  |
| H | 0.66939  | 9.37029  | 1.58497  |
| H | 3.16421  | 9.37397  | 1.58936  |
| H | 5.60689  | 9.37283  | 1.57337  |
| H | 6.84592  | 29.35802 | 1.37283  |
| H | 4.39039  | 29.35351 | 1.31879  |
| H | 1.90702  | 29.35719 | 1.39090  |
| H | 8.06115  | 9.36949  | 1.60056  |
| H | 10.54721 | 9.37028  | 1.55680  |
| H | 11.76777 | 29.36185 | 1.70037  |
| H | 9.30310  | 29.36141 | 1.70913  |
